# Supplementary material for: Impairment of Pol β-related DNA base-excision repair leads to ovarian aging in mice
Source: publisher site journal article supplement (doi:10.18632/aging.104123), 2020-11-20
Supplement: Supplementary file [file aging-v12i24-104123-supplementary-material-SD1.pdf]

## SUPPLEMENTARY FIGURE

A model figure

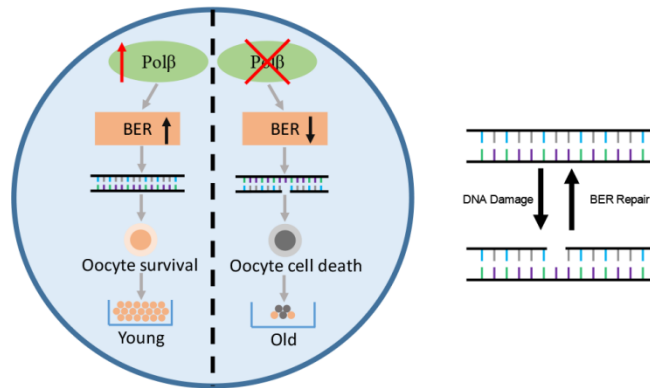

Supplementary Figure 1. Graphical summary of the model for impairment of Pol  $\beta$ - related DNA base-excision repair leads to ovarian aging in mice by this study.
